# Supplementary material
Source: publisher figshare collection journal article supplement (https://f1000.figshare.com/articles/dataset/_/96402)
Supplement: Supplementary file 1 [file 1]

## ***Justica flava***

### **Attributes**

- Local name: Lihululwa
- Common name: Yellow Justicia
- Family: Acanthaceae
- Plant origin: Indigenous
- Plant form: Herb/forb

### **Collection site**

- In relation to forest: Inside
- Forest block: Ikuywa
- Specific site name: Ikuywa

### **Collection site description**

Natural (minimum-impact) area

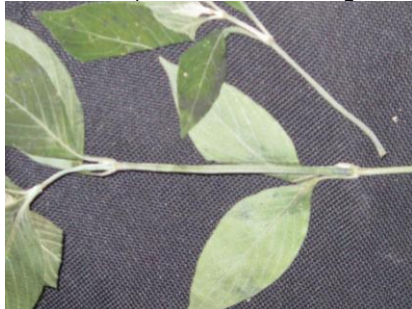

### **Symptoms or condition cured**

Reducing post-natal pains

### **Part used/from which medicine is extracted**

Roots

### **General preparation method**

Roots are crushed in mixture with water

### **Method of administering medication**

The mixture is taken orally by new mother immediately after delivery

### **Patient age group**

Adults

### **Patient gender:** Females
