# Supplementary material
Source: publisher figshare collection journal article supplement (https://f1000.figshare.com/articles/dataset/_/96402)
Supplement: Supplementary file 2 [file 1]

## ***Dovyalis macrocalyx***

### **Attributes**

- Local name: Shinavatevia
- Common name: Shaggy-fruited dovyalis
- Family: Flacourtiaceae
- Plant origin: Indigenous
- Plant form: Shrub

### **Collection site**

- In relation to forest: inside
- Forest block: Buyangu
- Specific site name: Kisere

**Collection site description:** Natural (undisturbed) area

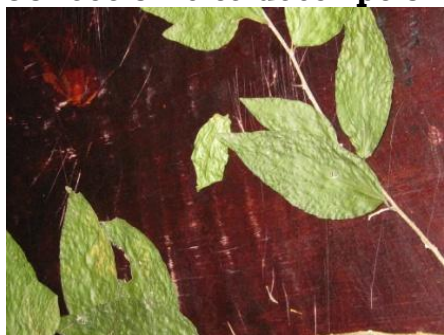

### **Symptoms or condition cured**

- Constipation
- Peptic ulcers

### **Part used/from which medicine is extracted**

- Roots for constipation
- Leaves for peptic ulcers

### **General preparation method**

- For constipation, clean roots are smashed and stir-mixed with water
- For peptic ulcers, leaves are crushed in mixture with honey

### **Method of administering medication**

- For constipation, extracted liquid taken orally by patient
- For peptic ulcers, the mixture is taken orally at least twice daily for a month or till symptoms disappear

### **Patient age group**

Mostly elderly people

**Patient gender:** Both genders
