# Supplementary material
Source: publisher figshare collection journal article supplement (https://f1000.figshare.com/articles/dataset/_/96402)
Supplement: Supplementary file 3 [file 1]

## ***Albizia grandi bracteata***

### **Attributes**

- Local name: Mukhunzuli
- Common name: Large-leaved Albizia
- Family: Fabaceae
- Plant origin: Indigenous
- Plant form: Tree

### **Collection site**

- In relation to forest: Outside forest
- Forest block: Buyangu
- Specific site name: Kisere

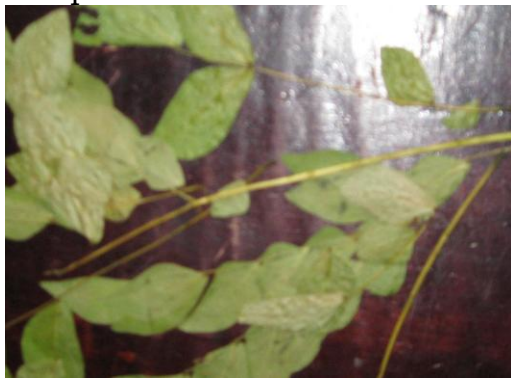

### **Symptoms or condition cured**

Gonorrhea

### **Collection site description**

Natural (undisturbed) area at forest edge

### **Part used/from which medicine is extracted**

Bark

### **General preparation method**

Bark boiled in water till it turns brown

### **Method of administering medication**

The extract is taken cold in the mornings and evenings for seven days consecutively

### **Patient age group**

Useful for all age groups

**Patient gender:** Both genders
