# Supplementary material
Source: publisher figshare collection journal article supplement (https://f1000.figshare.com/articles/dataset/_/96402)
Supplement: Supplementary file 4 [file 1]

## ***Desmodium adscendens***

### **Attributes**

- Local name: Matite
- Common name: Not ascertained
- Family: Fabaceae
- Plant origin: Indigenous
- Plant form: Herb/forb

### **Collection site**

- In relation to forest: Inside forest
- Forest block: Buyangu
- Specific site name: Kisere

### **Collection site description**

Natural (undisturbed) area

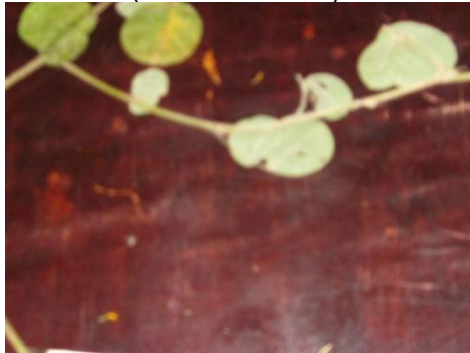

### **Symptoms or condition cured**

Stomach-ache

### **Part used/from which medicine is extracted**

Leaves

### **General preparation method**

Crush leaves and mix with water

### **Method of administering medication**

The mixture is taken cold particularly after a meal

### **Patient age group**

Useful for all age groups

### **Patient gender:** Both genders
