# Supplementary material
Source: publisher figshare collection journal article supplement (https://f1000.figshare.com/articles/dataset/_/96402)
Supplement: Supplementary file 5 [file 1]

## ***Leucas calostachys***

### **Attributes**

- Local name: Lumetsani
- Common name: Not ascertained
- Family: Lamiaceae
- Plant origin: Indigenous
- Plant form: Shrub

### **Collection site**

- In relation to forest: Inside
- Forest block: Ikuywa
- Specific site name: Chepsonoi

**Collection site description:** Grassland (near-natural)

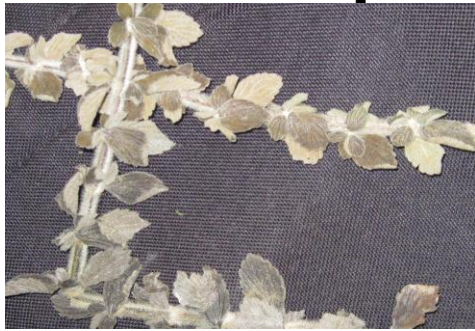

### **Symptoms or condition cured**

Severe diarrhea especially accompanied with blood stains

### **Part used/from which medicine is extracted**

Leaves

### **General preparation method**

Leaves crushed and mixed with water

### **Method of administering medication**

Extract taken orally by half a cup each morning and evening till diarrhea stops

### **Patient age group**

All age groups above 2 years

**Patient gender:** Both genders
