# Supplementary material
Source: publisher figshare collection journal article supplement (https://f1000.figshare.com/articles/dataset/_/96402)
Supplement: Supplementary file 6 [file 1]

## ***Chrysocephalum sp***

### **Attributes**

- Local name: Mwikalo
- Common name: Yellow Buttons
- Family: Asteraceae
- Plant origin: Indigenous
- Plant form: Shrub

### **Collection site**

- In relation to forest: Inside
- Forest block: Ikuywa
- Specific site name: Chepsonoi

### **Collection site description**

Natural (minimum-impact) area

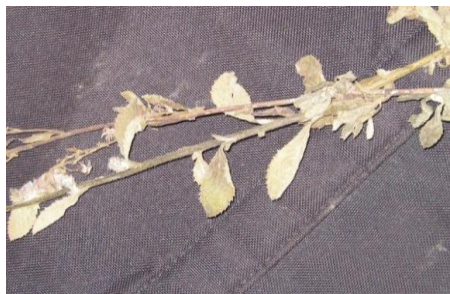

### **Symptoms or condition cured**

Stomach problems especially abdominal pains and related sexually transmitted infections

### **Part used/from which medicine is extracted**

Roots

### **General preparation method**

Roots are chopped and boiled in water till dark brownish in colour

### **Method of administering medication**

One glass of the concoction is taken orally twice each day (morning and evening)

### **Patient age group**

Adults

**Patient gender:** Both genders
