# Supplementary material
Source: publisher figshare collection journal article supplement (https://f1000.figshare.com/articles/dataset/_/96402)
Supplement: Supplementary file 7 [file 1]

## ***Senecio moorei***

### **Attributes**

- Local name: Not ascertained
- Common name: Not ascertained
- Family: Astraceae
- Plant origin: Indigenous
- Plant form: Shrub

### **Collection site**

- In relation to forest: Outside
- Forest block: Ikuywa
- Specific site name: Mukhumu

### **Collection site description**

Area with some human settlement

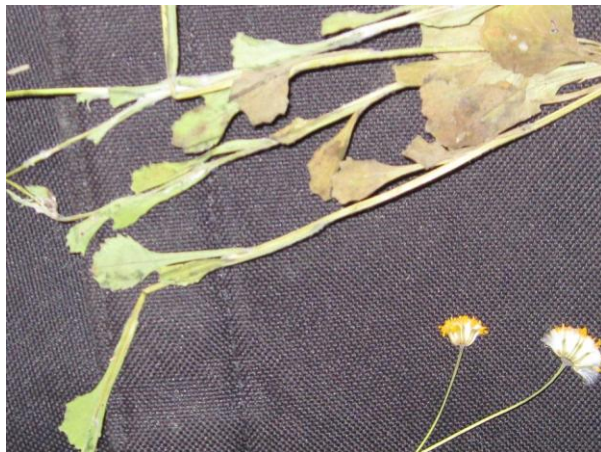

### **Symptoms or condition cured**

Cough

### **Part used/from which medicine is extracted**

Leaves

### **General preparation method**

Fresh green leaves are cleaned, chopped and roasted till turns they turn into ash to which is added a pinch of salt

### **Method of administering medication**

The patient licks up the ash at frequent intervals every day or till cough subsides

### **Patient age group**

All age groups above 2 years

### **Patient gender:** Both genders
