# Supplementary material
Source: publisher figshare collection journal article supplement (https://f1000.figshare.com/articles/dataset/_/96402)
Supplement: Supplementary file 8 [file 1]

## ***Erythrococca atrovirens***

### **Attributes**

- Local name: Shirietso
- Common name: Not ascertained
- Family: Euphorbiaceae
- Plant origin: Indigenous
- Plant form: Shrub

### **Collection site**

- In relation to forest: inside
- Forest block: Buyangu
- Specific site name: Ivakale

### **Collection site description**

Natural (undisturbed) area

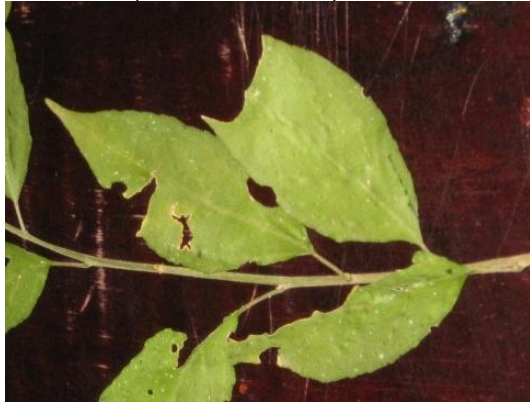

### **Symptoms or condition cured**

Wounds, especially septic

### **Part used/from which medicine is extracted**

Leaves

### **General preparation method**

Leaves crushed firmly between hands

### **Method of administering medication**

Extracted liquid from freshly crashed leaves is applied by directly pressing the crushed mass onto the wound

### **Patient age group**

Mostly elderly people

### **Patient gender:** Both genders
