# Supplementary material
Source: publisher figshare collection journal article supplement (https://f1000.figshare.com/articles/dataset/_/96402)
Supplement: Supplementary file 9 [file 1]

## ***Zanthoxylum gilleti***

### **Attributes**

- Local name: Shikhoma
- Common name: Not ascertained
- Family: Rutaceae
- Plant origin: Indigenous
- Plant form: Tree

### **Collection site**

- In relation to forest: Inside
- Forest block: Kaimosi
- Specific site name: Shamakhokho

### **Collection site description**

Human settlement area

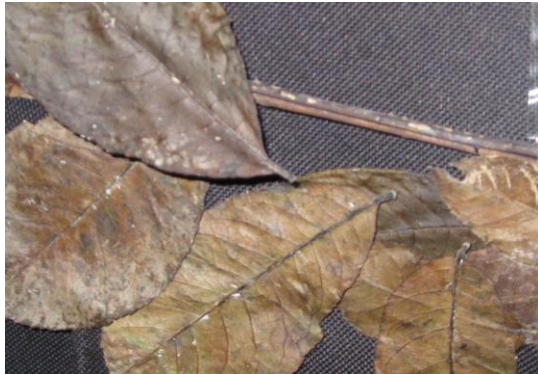

### **Symptoms or condition cured**

Cough and chest complications associated with bacterial infections

### **Part used/from which medicine is extracted**

Bark

### **General preparation method**

Bark crushed and mixed with water

### **Method of administering medication**

Mixture orally taken when cold

### **Patient age group**

All age-groups

**Patient gender:** Both genders
