# Supplementary material
Source: publisher figshare collection journal article supplement (https://f1000.figshare.com/articles/dataset/_/96402)
Supplement: Supplementary file 10 [file 1]

## ***Paullinia pinnata***

### **Attributes**

- Local name: Not ascertained
- Common name: Bread and cheese plant
- Family: Sapindaceae
- Plant origin: Indigenous
- Plant form: Shrub

### **Collection site**

- In relation to forest: Inside forest
- Forest block: Buyangu
- Specific site name: Shanderema

### **Collection site description**

Natural (undisturbed) area

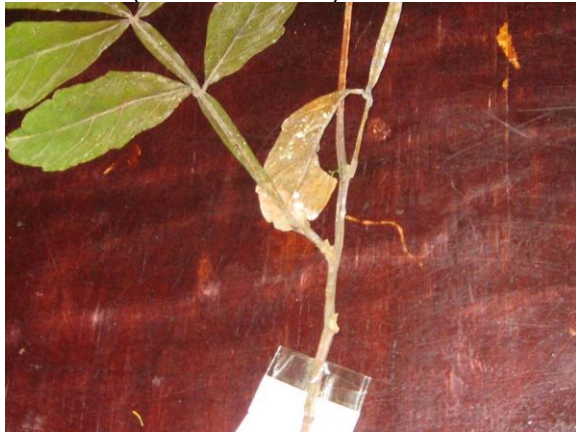

### **Symptoms or condition cured**

Hiccup

### **Part used/from which medicine is extracted**

Root

### **General preparation method**

Roots crushed and mixed with water

### **Method of administering medication**

The mixture taken orally especially when hiccups attack

### **Patient age group**

Useful for all age groups except children under 2

### **Patient gender:** Both genders
