# Supplementary material
Source: publisher figshare collection journal article supplement (https://f1000.figshare.com/articles/dataset/_/96402)
Supplement: Supplementary file 11 [file 1]

## ***Thunbergia alata***

### **Attributes**

- Local name: Indereresia
- Common name: Black-eyed Susan vine
- Family: Acanthaceae
- Plant origin: Indigenous
- Plant form: Shrub

### **Collection site**

- In relation to forest: Inside
- Forest block: Kaimosi
- Specific site name: Kaptik

### **Collection site description**

Natural (minimum-disturbance) area in a glade

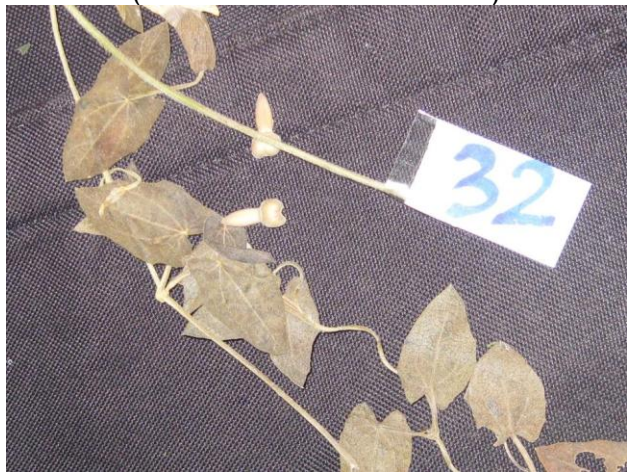

### **Symptoms or condition cured**

Joint dislocation for both humans and livestock

### **Part used/from which medicine is extracted**

Leaves

### **General preparation method**

Leaves are crushed and bound into a ball then heated in open fire

### **Method of administering medication**

Apply the ball of leaves onto the dislocated joint by pressing it firmly while still hot

### **Patient age group**

All age groups except

### **Patient gender:** Both genders
