# Supplementary material
Source: publisher figshare collection journal article supplement (https://f1000.figshare.com/articles/dataset/_/96402)
Supplement: Supplementary file 12 [file 1]

## ***Dissotis speciosa***

### **Attributes**

- Local name: Lunyili
- Common name: Not ascertained
- Plant origin: Indigenous
- Plant form: Shrub

### **Collection site**

- In relation to forest: Outside
- Forest block: Ikuywa
- Specific site name: Mukhumu

### **Collection site description**

Farmland area

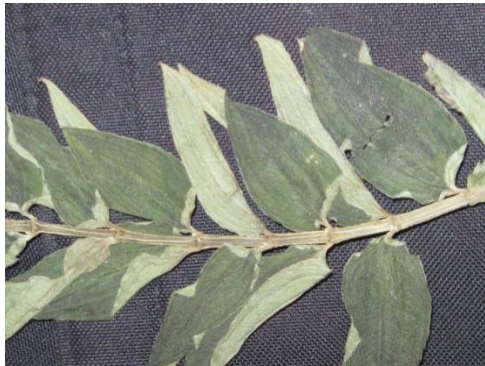

### **Symptoms or condition cured**

Diarrhea

### **Part used/from which medicine is extracted**

Leaves

### **General preparation method**

Leaves are crushed in mixture with water

### **Method of administering medication**

The patient takes the liquid extract orally

### **Patient age group**

All age groups

### **Patient gender:** Both genders
