# Supplementary material
Source: publisher figshare collection journal article supplement (https://f1000.figshare.com/articles/dataset/_/96402)
Supplement: Supplementary file 13 [file 1]

## ***Markhamia lutea***

### **Attributes**

- Local name: Lusiola
- Common name: Nile Tulip tree
- Family: Bignoniaceae
- Plant origin: Indigenous
- Plant form: Tree

### **Collection site**

- In relation to forest: Inside
- Forest block: Kaimosi
- Specific site name: Shinu

### **Collection site description**

Natural (minimum-disturbance) area near forest edge

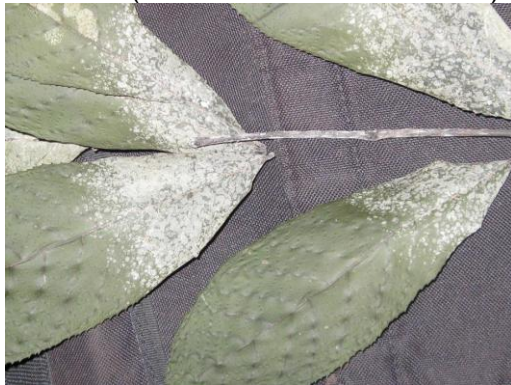

### **Symptoms or condition cured**

Ear pain in humans

Eye problems in cattle

### **Part used/from which medicine is extracted**

Leaves for both

### **General preparation method**

Crush young leaves and mix with water

### **Method of administering medication**

The concoction squeeze-dropped into the affected human ear or livestock eye

### **Patient age group**

All age-groups

**Patient gender:** Both genders
