# Supplementary material
Source: publisher figshare collection journal article supplement (https://f1000.figshare.com/articles/dataset/_/96402)
Supplement: Supplementary file 14 [file 1]

## ***Clematopsis scabiosifolia***

### **Attributes**

- Local name: Lunyili
- Common name: Not ascertained
- Family: Ranunculaceae
- Plant origin: Indigenous
- Plant form: Climber

### **Collection site**

- In relation to forest: Outside
- Forest block: Ikuywa
- Specific site name: Mukhumu

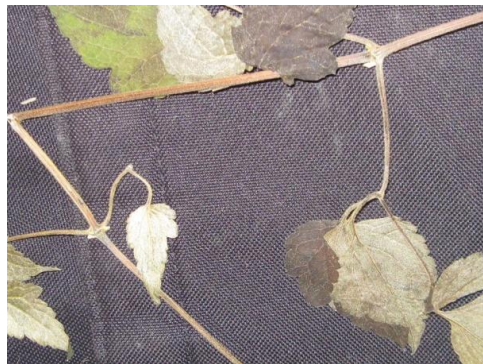

**Collection site description:** Farmland area

### **Symptoms or condition cured**

Stuffy nose and associated respiratory problems

### **Part used/from which medicine is extracted**

Flower

### **General preparation method**

Young leaves are crushed between the hands

### **Method of administering medication**

The crushed mass is inhaled at frequent regular intervals

### **Patient age group**

All age groups above 3 years

### **Patient gender:** Both genders

---
