# Supplementary material
Source: publisher figshare collection journal article supplement (https://f1000.figshare.com/articles/dataset/_/96402)
Supplement: Supplementary file 15 [file 1]

## ***Desmodium repandum***

### **Attributes**

- Local name: Not ascertained
- Common name: Not ascertained
- Family: Fabaceae
- Plant origin: Indigenous
- Plant form: Shrub

### **Collection site**

- In relation to forest: Inside forest
- Forest block: Buyangu
- Specific site name: Shanderema

### **Collection site description**

Natural (undisturbed) area

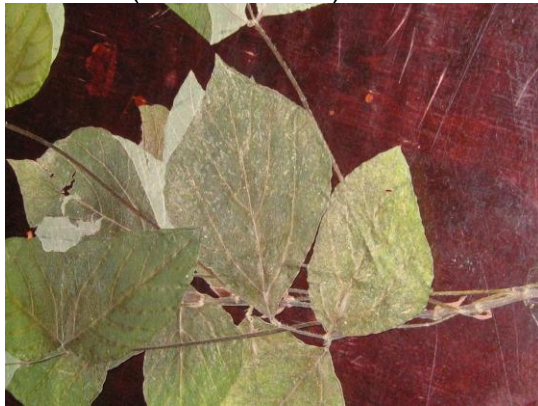

### **Symptoms or condition cured**

Stomach upset

### **Part used/from which medicine is extracted**

Leaves

### **General preparation method**

Crush leaves in mixture with water

### **Method of administering medication**

The mixture is taken orally

### **Patient age group**

Useful for all age groups

### **Patient gender:** Both genders
