# Supplementary material
Source: publisher figshare collection journal article supplement (https://f1000.figshare.com/articles/dataset/_/96402)
Supplement: Supplementary file 16 [file 1]

## ***Olea capensis***

### **Attributes**

- Local name: Mutukhuyu
- Common name: Elgon Olive
- Scientific name: *Olea capensis*
- Family: Oleaceae
- Plant origin: Indigenous
- Plant form: Tree

### **Collection site**

- In relation to forest: Inside
- Forest block: Isecheno
- Specific site name: Shaviyoni

**Collection site description:** Natural (limited disturbance) area

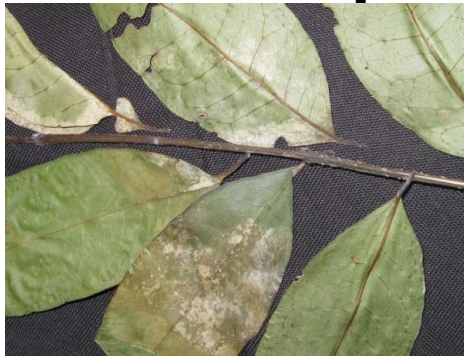

### **Symptoms or condition cured**

Stomach-ache

Peptic ulcers

### **Part used/from which medicine is extracted**

Bark for both ailments

### **General preparation method**

- For stomach-ache, bark boiled in water
- For peptic ulcers, the bark is crushed and mixed with water

### **Method of administering medication**

- For stomach-ache, the concoction drunk cold especially just before meals
- For peptic ulcers, the concoction is drunk daily till symptoms disappear

### **Patient age group**

All age-groups

**Patient gender:** Both genders
