# Supplementary material
Source: publisher figshare collection journal article supplement (https://f1000.figshare.com/articles/dataset/_/96402)
Supplement: Supplementary file 17 [file 1]

## ***Sapium ellypticum***

### **Attributes**

- Local name: Musasa
- Common name: Jumping seed tree
- Family: Euphorbiaceae
- Plant origin: Indigenous
- Plant form: Tree

### **Collection site**

- In relation to forest: Inside
- Forest block: Kaimosi
- Specific site name: Shamakhokho

### **Collection site description**

Natural (minimum-disturbance) area

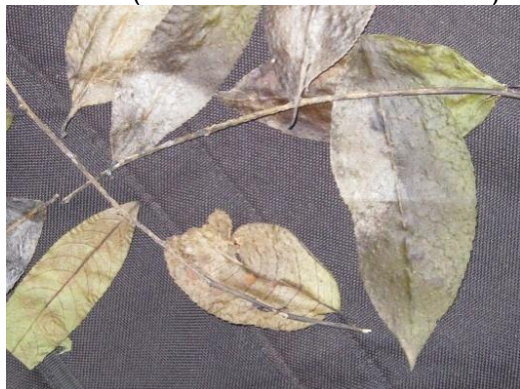

### **Symptoms or condition cured**

Eye problems in livestock such as by injury or infection

### **Part used/from which medicine is extracted**

Leaves

### **General preparation method**

Leaves crushed and mixed with water

### **Method of administering medication**

Extract squeeze-dropped into affected eye as frequently as necessary till healing is achieved

**Patient age group:** N/A

**Patient gender:** N/A
