# Supplementary material
Source: publisher figshare collection journal article supplement (https://f1000.figshare.com/articles/dataset/_/96402)
Supplement: Supplementary file 18 [file 1]

## ***Piper capense***

### **Attributes**

Local name: Unascertained

- Common name: Staart Pepper
- Family: Piperaceae
- Plant origin: Indigenous
- Plant form: Shrub

### **Collection site**

- In relation to forest: Inside
- Forest block: Isecheno
- Specific site name: Shaviyoni

### **Collection site description**

Natural (undisturbed) area

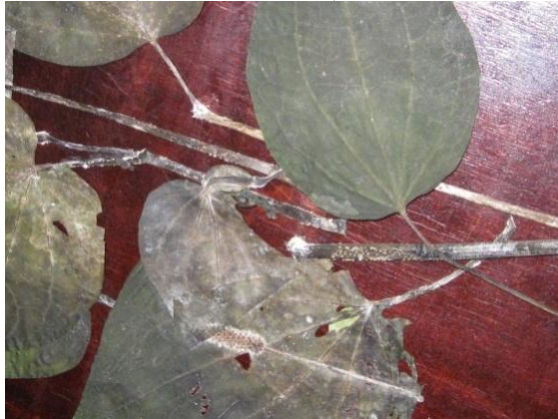

### **Symptoms or condition cured**

Cough

### **Part used/from which medicine is extracted**

Fruits

### **General preparation method**

Whole or crushed/chopped into bits

### **Method of administering medication**

- Adults simply eat/chew the fruits on experiencing attacks;
- For babies, fruit bits taken gradually administered

**Patient age group:** All age-groups

**Patient gender:** Both genders
