# Supplementary material
Source: publisher figshare collection journal article supplement (https://f1000.figshare.com/articles/dataset/_/96402)
Supplement: Supplementary file 19 [file 1]

## ***Lantana trifolia***

### **Attributes**

- Local name: Imbulimutacha
- Common name: Three-leaf Shrub verbena
- Family: Verbenaceae
- Plant origin: Indigenous
- Plant form: Shrub

### **Collection site**

- In relation to forest: Inside
- Forest block: Kaimosi
- Specific site name: Kaptik

### **Collection site description**

Natural (minimum-disturbance) area in a glade

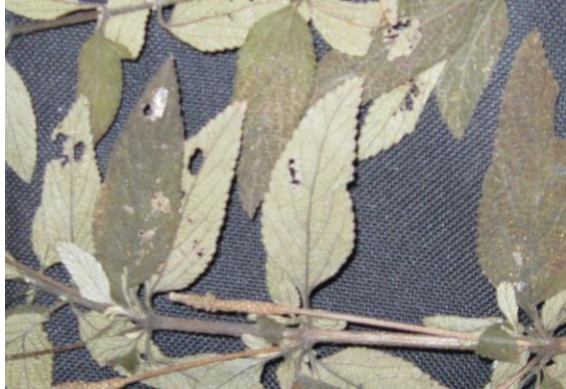

### **Symptoms or condition cured**

Malaria and general fever (humans);  
Diarrhea in livestock

### **Part used/from which medicine is extracted**

Roots in both cases

### **General preparation method**

In both cases, roots are crushed and mixed with water

### **Method of administering medication**

- For malaria, the concoction taken orally when cold, twice daily
- For livestock, the concoction is administered each morning only, in cold form

### **Patient age group**

For humans, all age groups except babies under 2 years

**Patient gender:** Both genders
