# Supplementary material
Source: publisher figshare collection journal article supplement (https://f1000.figshare.com/articles/dataset/_/96402)
Supplement: Supplementary file 20 [file 1]

## ***Coffea eugenioides***

### **Attributes**

- Local name: Itikwa
- Common name: Mufindi coffee
- Family: Rubiaceae
- Plant origin: Indigenous
- Plant form: Shrub

### **Collection site**

- In relation to forest: Inside
- Forest block: Kaimosi
- Specific site name: Musasa

**Collection site description:** Natural (minimum-disturbance) area

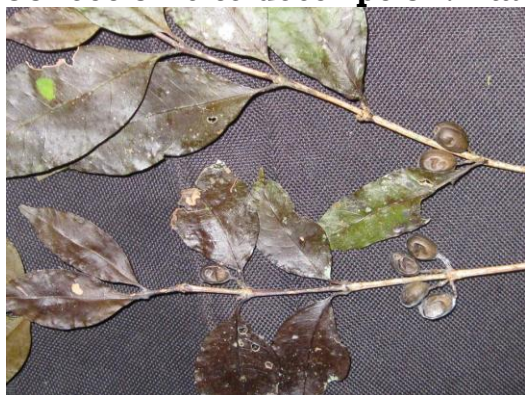

### **Symptoms or condition cured**

Eye problems in livestock

### **Part used/from which medicine is extracted**

Leaves

### **General preparation method**

Leaves are crushed

### **Method of administering medication**

Crushed leaves mixed with water and exudate squeeze-dropped into affected eye(s) frequently

### **Patient age group**

N/A

**Patient gender:** N/A
