# Supplementary material
Source: publisher figshare collection journal article supplement (https://f1000.figshare.com/articles/dataset/_/96402)
Supplement: Supplementary file 21 [file 1]

## ***Solanum incanum***

### **Attributes**

- Local name: Indalandalwa
- Common name: Sodom Apple
- Family: Solanaceae
- Plant origin: Indigenous
- Plant form: Shrub

### **Collection site**

- In relation to forest: Outside
- Forest block: Ikuywa
- Specific site name: Mukhumu

### **Collection site description**

Area with some human settlement

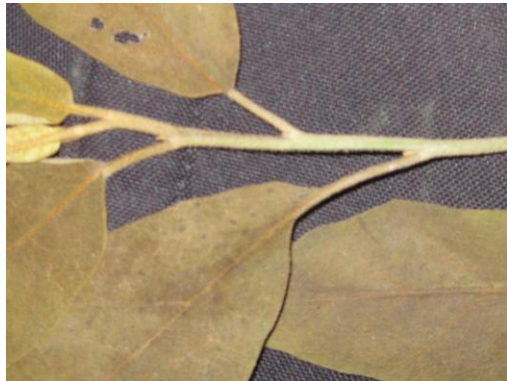

### **Symptoms or condition cured**

Stomach-ache

### **Part used/from which medicine is extracted**

Roots

### **General preparation method**

Roots cleaned using water and chopped into short strands

### **Method of administering medication**

Leaves chewed up and liquid swallowed as soon as stomach-ache strikes

### **Patient age group**

All age groups

**Patient gender:** Both genders
