# Supplementary material
Source: publisher figshare collection journal article supplement (https://f1000.figshare.com/articles/dataset/_/96402)
Supplement: Supplementary file 22 [file 1]

## ***Ocimum kilimandscharicum***

### **Attributes**

- Local name: Not ascertained
- Family: Lamiaceae
- Common name: Kilimanjaro basil,
- Plant origin: Indigenous
- Plant form: Shrub

### **Collection site**

- In relation to forest: Inside
- Forest block: Buyangu
- Specific site name: Buyangu

**Collection site description:** Natural (minimum-disturbance) near edge

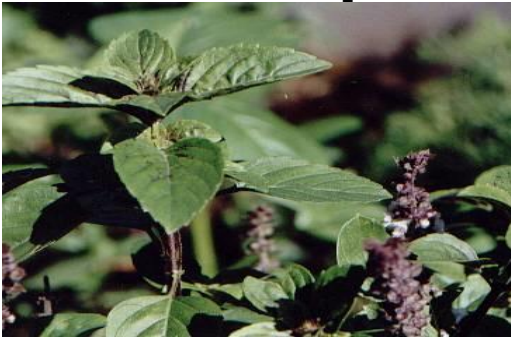

### **Symptoms or condition cured**

Nasal congestion, colds, flu, insect bites, aches and pains

### **Part used/from which medicine is extracted**

Leaves

### **General preparation method**

Drying leaves and grinding to powder

### **Method of administering medication**

- The powder is inhaled or drunk with tea to relieve nasal congestion, colds and flu;
- The powder is mixed with a little cow's oil/ghee and rubbed onto insect bite wounds or massaged into painful joints

### **Patient age group**

All age groups

**Patient gender:** Both genders
