# Supplementary material
Source: publisher figshare collection journal article supplement (https://f1000.figshare.com/articles/dataset/_/96402)
Supplement: Supplementary file 23 [file 1]

## ***Toddalia asiatica***

### **Attributes**

- Local name: Unascertained
- Common name: Orange climber
- Family: Rutaceae
- Plant origin: Indigenous
- Plant form: Shrub

### **Collection site**

- In relation to forest: Inside
- Forest block: Kaimosi
- Specific site name: Jukuye

### **Collection site description**

Human settlement area

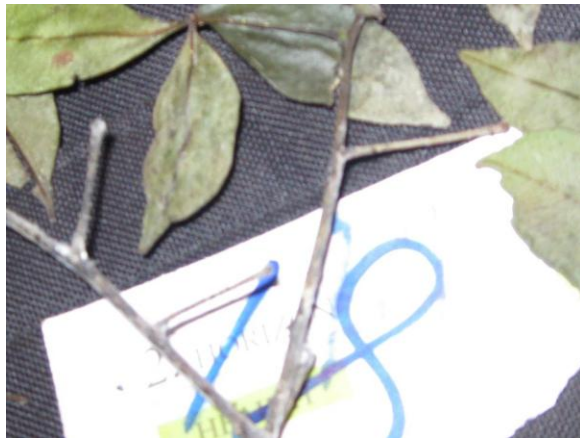

### **Symptoms or condition cured**

Worms in cattle

### **Part used/from which medicine is extracted**

Root

### **General preparation method**

Roots crushed and mixed with water

### **Method of administering medication**

Concoction administered orally to stock

### **Patient age group**

N/A

### **Patient gender:** N/A
