# Supplementary material
Source: publisher figshare collection journal article supplement (https://f1000.figshare.com/articles/dataset/_/96402)
Supplement: Supplementary file 24 [file 1]

## ***Prunus africana***

### **Attributes**

- Local name: Mwiritisa
- Common name: Red Stinkwood
- Family: Rosaceae
- Plant origin: Indigenous
- Plant form: Tree

### **Collection site**

- In relation to forest: inside
- Forest block: Buyangu
- Specific site name: Ivakale

### **Collection site description**

Natural (undisturbed) area on the forest edge

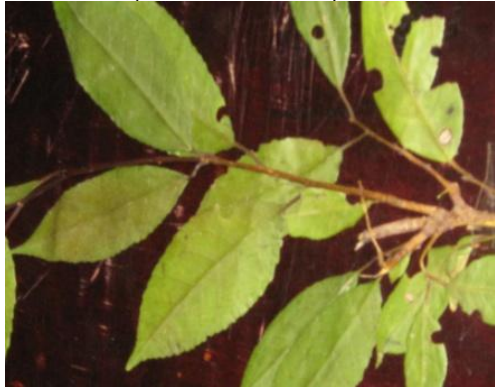

### **Symptoms or condition cured**

- Prostrate cancer
- Stomach-ache

### **Part used/from which medicine is extracted**

Roots and bark

### **General preparation method**

- For prostrate cancer, simply crush bark and mix with water
- For stomach-ache, boil the mixture of crushed bark and water till extract is pinkish in colour

### **Method of administering medication**

- For prostrate cancer, drink the mixture straight on
- For stomach-ache, allow the boiled extract to cool then drink

### **Patient age group**

- For prostate elderly patients
- For stomach-ache, all age groups

**Patient gender**

- For prostate cancer, males only
- For stomach-ache, both genders
