# Supplementary material
Source: publisher figshare collection journal article supplement (https://f1000.figshare.com/articles/dataset/_/96402)
Supplement: Supplementary file 25 [file 1]

## ***Albizia gummifera***

### **Attributes**

- Local name: Musenzeli
- Common name: Peacock flower
- Family: Fabaceae
- Plant origin: Indigenous
- Plant form: Tree

### **Collection site**

- In relation to forest: Inside
- Forest block: Isecheno
- Specific site name: Muleche

### **Collection site description**

Farmland

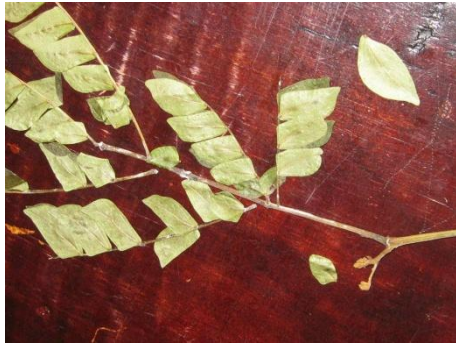

### **Symptoms or condition cured**

- Sexually transmitted infections especially gonorrhea;
- Stomach-ache

### **Part used/from which medicine is extracted**

Roots and bark

### **General preparation method**

Roots and bark crashed and boiled

### **Method of administering medication**

The concoction taken orally when cool, daily till healing is achieved

### **Patient age group**

Useful for adults

### **Patient gender:** Both genders
