# Supplementary material
Source: publisher figshare collection journal article supplement (https://f1000.figshare.com/articles/dataset/_/96402)
Supplement: Supplementary file 26 [file 1]

## ***Diospyros abyssinica***

### **Attributes**

- Local name: Lusui
- Common name: Giant Ebony
- Family: Ebenaceae
- Plant origin: Indigenous
- Plant form: Tree

### **Collection site**

- In relation to forest: Inside
- Forest block: Isecheno
- Specific site name: Virembe

### **Collection site description**

Natural (undisturbed) area

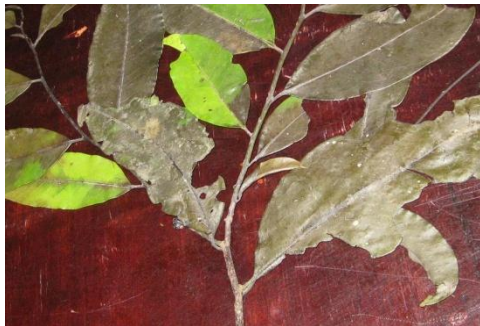

### **Symptoms or condition cured**

- Recurrent nightmares
- Sores

### **Part used/from which medicine is extracted**

- For nightmares, the bark;
- For sores, leaves

### **General preparation method**

- For nightmares, bark used in bedroom
- For sores, fresh leaves are crushed

### **Method of administering medication**

- For nightmares, bark placed under pillow or close to head as victim goes to sleep
- For sores, the crushed leaves are squeezed into the wound daily

### **Patient age group**

Useful mainly for adults

**Patient gender:** Both genders
