# Supplementary material
Source: publisher figshare collection journal article supplement (https://f1000.figshare.com/articles/dataset/_/96402)
Supplement: Supplementary file 27 [file 1]

## ***Azadirachta indica***

### **Attributes**

*Local Name: Muarubaini* (meaning a cure for 40 illnesses)

- Common Name: Neem tree
- Family: Meliaceae
- Plant origin: Exotic
- Plant form: Tree

### **Collection site**

- In relation to forest: Outside
- Forest block: Kaimosi
- Specific site name: Kaptik

### **Collection site description**

On farmland

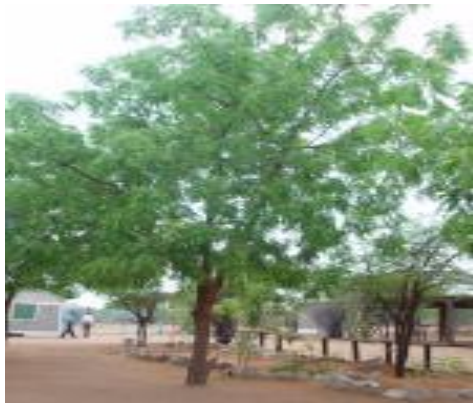

### **Symptoms or condition cured**

Fever, aches, pains, malaria attack, insect bites, pest control, skin infections

### **Part used/from which medicine is extracted**

Leaves, roots or bark

### **General preparation method**

- For fever, malaria, aches and pains, the leaves boiled in water and the resulting dark extract filtered out
- For insect bites and skin infections, the fruits are pounded and the oil extracted
- For pest control, the leaves, roots or barks are dried and ground into powder

### **Method of administering medication**

- For aches and pains, malaria and fever, the extracted filtrate is drunk while hot at least twice each day till symptoms disappear, or the patient is covered in a blanket over the steaming liquid for about 6 minutes twice each day

- For insect bites, skin infections and painful joints, the extracted oily substance from the seeds is applied by rubbing firmly and directly onto the wound or painful joints
- For pest control, the powder from the dried leaves or bark is spread over the infested area, or as in the case of domestic insects, the fresh leaves are smoke-burned in the infested room with most openings closed for at least 10 minutes

**Patient age group**

Any age group

**Patient gender:** Both genders
