# Supplementary material
Source: publisher figshare collection journal article supplement (https://f1000.figshare.com/articles/dataset/_/96402)
Supplement: Supplementary file 28 [file 1]

## ***Rhus natalensis***

### **Attributes**

- Local name: Busanguli
- Common name: Desert date
- Family: Anacardiaceae
- Plant origin: Indigenous
- Plant form: Shrub

### **Collection site**

- In relation to forest: Inside
- Forest block: Ikuywa
- Specific site name: Ikuywa

### **Collection site description**

Natural (minimum-impact) area

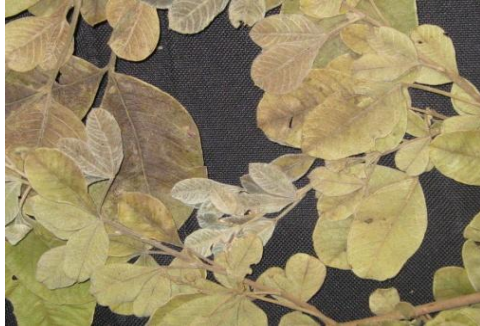

### **Symptoms or condition cured**

Worm infections in humans and livestock

### **Part used/from which medicine is extracted**

Roots

### **General preparation method**

Roots are crushed together with water

### **Method of administering medication**

The mixture is taken orally by patient, not necessarily boiled

### **Patient age group**

N/A

**Patient gender:** N/A
