# Supplementary material
Source: publisher figshare collection journal article supplement (https://f1000.figshare.com/articles/dataset/_/96402)
Supplement: Supplementary file 29 [file 1]

## ***Mondia whitei***

### **Attributes**

- Local name: Mukomera or Mukombela
- Family: Apocynaceae)
- Local name: White's ginger
- Plant origin: Indigenous
- Plant form: Climber

### **Collection site**

- In relation to forest: Inside
- Forest block: Isecheno
- Specific site name: Isecheno

### **Collection site description**

Natural (minimum-disturbance)

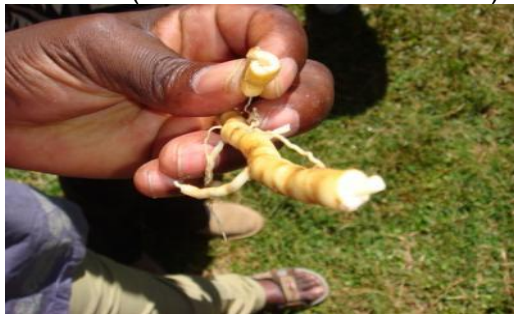

### **Symptoms or condition cured**

- Loss of appetite
- Loss of sexual libido
- General fatigue
- Mineral deficiency

### **General preparation method**

The roots of mature plant are dug out, cleaned and chopped up into small rods

### **Symptoms or condition cured**

For all, indications/symptoms, the epidermal layer of the root is chewed, preferably while still fresh, as frequently as necessary

### **Patient age groups**

All above two years of age

**Patient gender:** Both genders
