# Supplementary material
Source: publisher figshare collection journal article supplement (https://f1000.figshare.com/articles/dataset/_/96402)
Supplement: Supplementary file 30 [file 1]

## ***Paulownia tomentosa***

### **Attributes**

- Local name: Musembe
- Common name: Foxglove tree/Cat's Claw
- Family: Paulowniaceae
- Plant origin: Exotic
- Plant form: Tree

### **Collection site**

- In relation to forest: Outside
- Forest block: Ikuywa
- Specific site name: Chepsonoi

### **Collection site description**

Farmland area

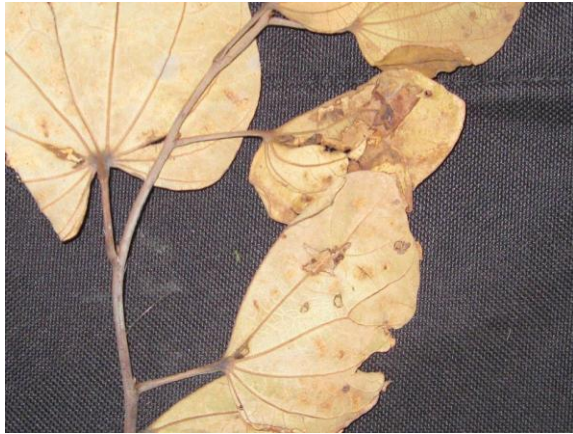

### **Symptoms or condition cured**

Stomach problems and boils

### **Part used/from which medicine is extracted**

Young shoots and roots

### **General preparation method**

Roots and shoots are chopped, crushed and mixed with a little water

### **Method of administering medication**

- The concoction is taken orally without boiling
- The leaves may also be used for fermenting porridge

### **Patient age group**

All age groups

**Patient gender:** Both genders
