# Supplementary material
Source: publisher figshare collection journal article supplement (https://f1000.figshare.com/articles/dataset/_/96402)
Supplement: Supplementary file 31 [file 1]

## ***Hibiscus sp***

### **Attributes**

- Local name: Lubulwa
- Common name: Not ascertained
- Family: Malvoideae
- Plant origin: Indigenous
- Plant form: Shrub

### **Collection site**

- In relation to forest: Inside
- Forest block: Kaimosi
- Specific site name: Kaptik

**Collection site description:** Natural (minimum-disturbance) area in a glade

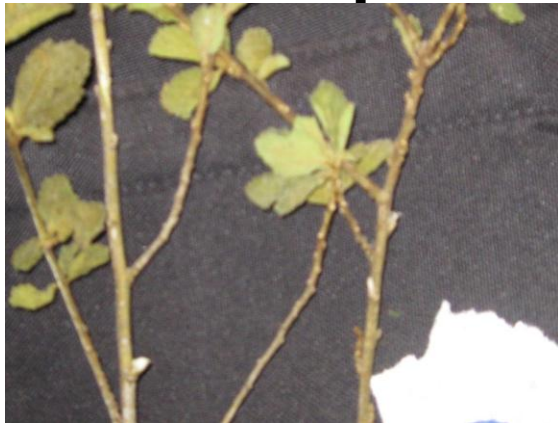

### **Symptoms or condition cured**

Stomach-ache and general fever

### **Part used/from which medicine is extracted**

Roots

### **General preparation method**

Roots boiled in water

### **Method of administering medication**

Extract taken either warm or cold. At least half a glass each time from first preparation then full glass each time for subsequent preparations of the same bark

### **Patient age group**

All age groups except especially adults

**Patient gender:** Both genders
