# Supplementary material
Source: publisher figshare collection journal article supplement (https://f1000.figshare.com/articles/dataset/_/96402)
Supplement: Supplementary file 32 [file 1]

## ***Bequartiodendron oblanceolata***

### **Attributes**

- Local name: Musamia
- Common name: Not ascertained
- Family: Not clearly ascertained
- Plant origin: Indigenous
- Plant form: Tree

### **Collection site**

- In relation to forest: Inside
- Forest block: Kaimosi
- Specific site name: Shinu

### **Collection site description**

Natural (minimum-disturbance) area

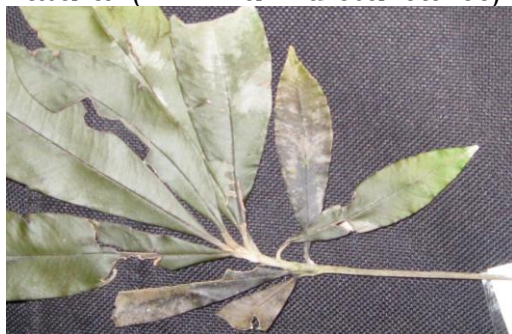

### **Symptoms or condition cured**

Ulcers in digestive track

Boils especially around the belly

### ***Part used/from which medicine is extracted***

- Bark for ulcers;
- Leaves for boils

### **General preparation method**

- For ulcers, bark boiled in water
- For boils, leaves are crushed in mixture with water

### **Method of administering medication**

- For ulcers, the concoction taken by patient when it is cold
- For boils, the concoction is drunk daily till symptoms disappear

### **Patient age group**

All age-groups older than 2 years

**Patient gender:** Both genders
