# Supplementary material
Source: publisher figshare collection journal article supplement (https://f1000.figshare.com/articles/dataset/_/96402)
Supplement: Supplementary file 33 [file 1]

## ***Clerodendron pygmaeum***

### **Attributes**

- Local name: Luseshe
- Common name: Cashmere Bouquet/Strong-scented glorybower
- Family: Verbenaceae
- Plant origin: Indigenous
- Plant form: Shrub
- **Collection site**
- In relation to forest: Inside
- Forest block: Kaimosi
- Specific site name: Musasa

**Collection site description:** Natural (minimum-disturbance) area in a forest glade

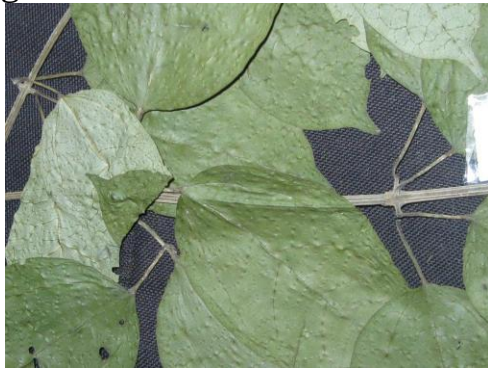

### **Symptoms or condition cured**

Common flu and associated symptoms

### **Part used/from which medicine is extracted**

Root

### **General preparation method**

The roots are crushed

### **Method of administering medication**

Crushed roots mix with water and taken frequently

### **Patient age group**

All age groups

**Patient gender:** Both genders
