# Supplementary material
Source: publisher figshare collection journal article supplement (https://f1000.figshare.com/articles/dataset/_/96402)
Supplement: Supplementary file 34 [file 1]

## ***Plectranthus forsteri***

### **Attributes**

- Local name: Shikhokho
- Common name: Spur flower
- Family: Lamiaceae
- Plant origin: Indigenous
- Plant form: Shrub

### **Collection site**

- In relation to forest: Outside
- Forest block: Ikuywa
- Specific site name: Ikuywa

### **Collection site description**

Human settlement area

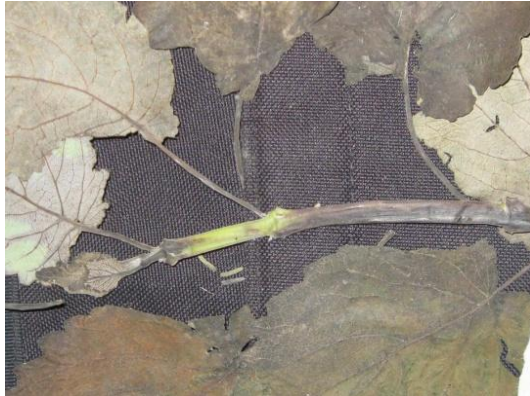

### **Symptoms or condition cured**

Worm infection in livestock

### **Part used/from which medicine is extracted**

Leaves

### **General preparation method**

Leaves are crushed together with water

### **Method of administering medication**

The mixture is administered to the affected animal orally

### **Patient age group**

N/A

### **Patient gender: N/A**
