# Supplementary material
Source: publisher figshare collection journal article supplement (https://f1000.figshare.com/articles/dataset/_/96402)
Supplement: Supplementary file 35 [file 1]

## ***Leucas deflexa***

### **Attributes**

- Local name: Shitsunzune
- Common name: Not ascertained
- Family: Lamiaceae
- Plant origin: Indigenous
- Plant form: Shrub

### **Collection site**

- In relation to forest: Outside
- Forest block: Ikuywa
- Specific site name: Mukhumu

### **Collection site description**

Area with some human settlement

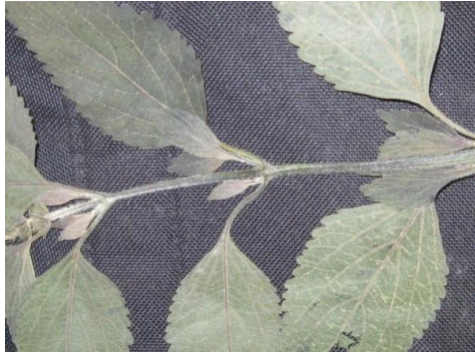

### **Symptoms or condition cured**

Eye infection/effects in livestock

### **Part used/from which medicine is extracted**

Leaves

### **General preparation method**

The leaves are cleaned up with water and chewed till soft

### **Method of administering medication**

The chewed-up ball is squeezed into the affected eye

### **Patient age group**

N/A

### **Patient gender:** N/A
