# Supplementary material
Source: publisher figshare collection journal article supplement (https://f1000.figshare.com/articles/dataset/_/96402)
Supplement: Supplementary file 36 [file 1]

## ***Piper umbellatum***

### **Attributes**

- Local name: Indava
- Common name: Cow-foot leaf
- Family: Piperaceae
- Plant origin: Indigenous
- Plant form: Shrub

### **Collection site**

- In relation to forest: Inside
- Forest block: Kaimosi
- Specific site name: Shamakhokho

### **Collection site description**

Natural (minimum-disturbance) area

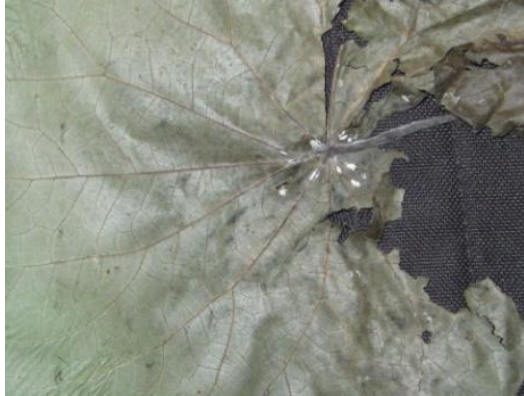

### **Symptoms or condition cured**

Head-ache and fever

### **Part used/from which medicine is extracted**

Leaves

### **General preparation method**

Leaves are crushed and mixed with water

### **Method of administering medication**

The mixture is dropped in bits into the nose

### **Patient age group**

All age-groups older than 2 years

### **Patient gender:** Both genders
