# Supplementary material
Source: publisher figshare collection journal article supplement (https://f1000.figshare.com/articles/dataset/_/96402)
Supplement: Supplementary file 37 [file 1]

## ***Entada abyssinica***

### **Attributes**

- Local name: Shivayamboga
- Common name: Abyssinia Entada
- Family: Leguminosaceae
- Plant origin: Indigenous
- Plant form: Tree

### **Collection site**

- In relation to forest: Outside
- Forest block: Ikuywa
- Specific site name: Chepsonoi

### **Collection site description**

Farmland area

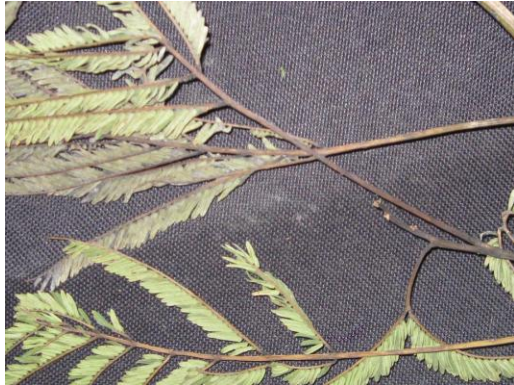

### **Symptoms or condition cured**

Stomach-ache

### **Part used/from which medicine is extracted**

Bark

### **General preparation method**

Crush and boil the bark in water

### **Method of administering medication**

The extract is orally taken

### **Patient age group**

All age groups

**Patient gender:** Both genders
