# Supplementary material
Source: publisher figshare collection journal article supplement (https://f1000.figshare.com/articles/dataset/_/96402)
Supplement: Supplementary file 38 [file 1]

## ***Aspilia pluriseta***

### **Attributes**

- Local name: Shralambila
- Common name: Dwarf aspilia
- Family: Asteraceae
- Plant origin: Indigenous
- Plant form: Herb/forb

### **Collection site**

- In relation to forest: Outside
- Forest block: Ikuywa
- Specific site name: Ikuywa

### **Collection site description**

Human area

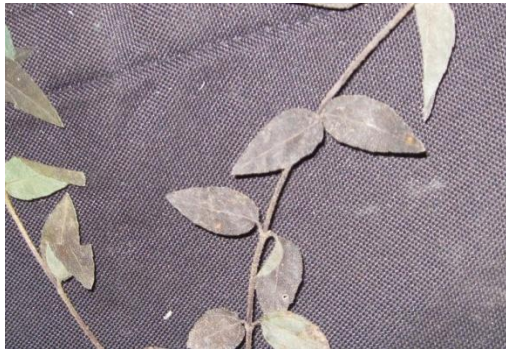

### **Symptoms or condition cured**

- Stopping bleeding in wounds;
- Drippy nose in poultry

### **Part used/from which medicine is extracted**

Leaves for both

### **General preparation method**

- For stopping bleeding, leaves are crushed firmly between hands
- For poultry nose cure, leaves are crushed and in mixture with water
- 

### **Method of administering medication**

- To stop bleeding, the crushed leaves are applied by pressing firmly onto wound, holding on till bleeding stops
- For affected poultry, the extract is administered twice daily till symptoms disappear

### **Patient age group**

All age groups

**Patient gender:** Both genders
