# Supplementary material
Source: publisher figshare collection journal article supplement (https://f1000.figshare.com/articles/dataset/_/96402)
Supplement: Supplementary file 39 [file 1]

## ***Conyza floribunda***

### **Collection site**

In relation to forest: Outside

Forest block: Ikuywa

Specific site name: Mukhumu

### **Collection site description**

Area with some human settlement

### **Attributes**

- Local name: Liposhe
- Common name: Asthma weed
- Family: Asteraceae
- Plant origin: Indigenous
- Plant form: Shrub

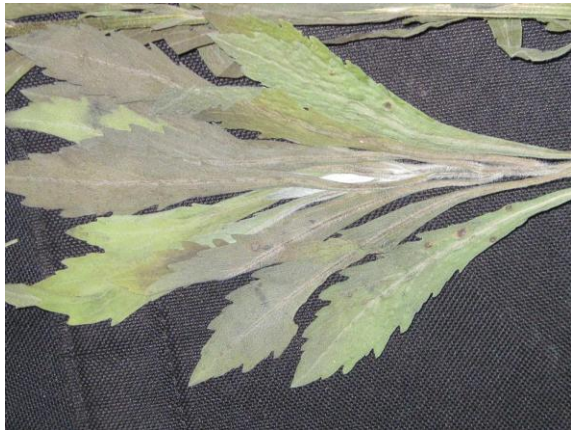

### **Symptoms or condition cured**

Tooth-ache

### **Part used/from which medicine is extracted**

Leaves

### **General preparation method**

Leaves are harvested and cleaned with water

### **Method of administering medication**

The patient chews the leaves especially involving the affected tooth-teeth

### **Patient age group**

All age groups above 2 years

### **Patient gender:** Both genders
