# Supplementary material
Source: publisher figshare collection journal article supplement (https://f1000.figshare.com/articles/dataset/_/96402)
Supplement: Supplementary file 40 [file 1]

## ***Trichilia emetica***

### **Attributes**

- Local name: Munyama
- Common name: Banket mahogany
- Family: Meliaceae
- Plant origin: Indigenous
- Plant form: Tree

### **Collection site**

- In relation to forest: Inside
- Forest block: Kaimosi
- Specific site name: Shamakhokho

### **Collection site description**

Natural (minimum-disturbance) area

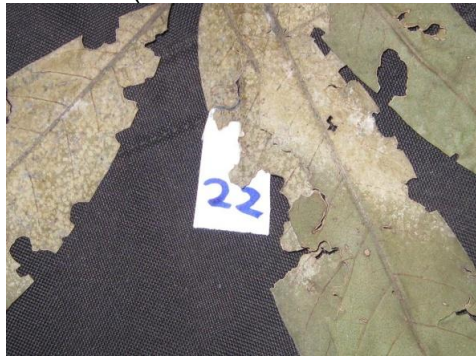

### **Symptoms or condition cured**

Fever, stomach-ache and sexually transmitted infections  
Malaria

### **Part used/from which medicine is extracted**

Bark for all

### **General preparation method**

Bark crushed and boiled with water till it turns pink

### **Method of administering medication**

Mixture orally taken when cold

For malaria, half a glass of the extract is taken each morning till healed

### **Patient age group**

All age-groups

**Patient gender:** Both genders
